# Supplementary material for: Post-transplant cyclophosphamide versus anti-thymocyte globulin for graft-versus-host disease prevention in haploidentical transplantation for adult acute lymphoblastic leukemia
Source: PubMed Central journal article supplement — Haematologica. 2020 Apr 30;106(6):1591–8. doi: 10.3324/haematol.2020.247296 (PMC8168508; doi:10.3324/haematol.2020.247296), 2020-04-30
Supplement: 2020_247296_NAGLER_SUPPL.pdf [file 2020_247296_NAGLER_SUPPL.pdf]

# Post-transplant cyclophosphamide versus anti-thymocyte globulin for graft-versus-host disease prevention in haploidentical transplantation for adult acute lymphoblastic leukemia

Arnon Nagler,<sup>1\*</sup> Abraham S. Kanate,<sup>2\*</sup> Myriam Labopin,<sup>3\*</sup> Fabio Ciceri,<sup>4</sup> Emanuele Angelucci,<sup>5</sup> Yener Koc,<sup>6</sup> Zafer Gülbaz,<sup>7</sup> William Arcese,<sup>8</sup> Johanna Tischer,<sup>9</sup> Pietro Pioltelli,<sup>10</sup> Hakan Ozdogu,<sup>11</sup> Boris Afanasyev,<sup>12</sup> Depei Wu,<sup>13</sup> Mutlu Arat,<sup>14</sup> Zinaida Peric,<sup>15</sup> Sebastian Giebel,<sup>16</sup> Bipin Savani<sup>17</sup> and Mohamad Mohty<sup>18</sup>

<sup>1</sup>Chaim Sheba Medical Center, Tel Aviv University, Tel-Hashomer, Israel; <sup>2</sup>West Virginia University, Morgantown, WV, USA; <sup>3</sup>Department of Hematology and EBMT Paris study office / CEREST-TC, Saint Antoine Hospital, Paris, France; <sup>4</sup>Ospedale San Raffaele s.r.l., Milano, Italy; <sup>5</sup>Ospedale San Martino, Department of Hematology II, Genova, Italy; <sup>6</sup>Medical Park Hospitals, Stem Cell Transplant Unit, Antalya, Turkey; <sup>7</sup>Anadolu Medical Center Hospital, Bone Marrow Transplantation Department, Kocaeli, Turkey; <sup>8</sup>Tor Vergata University of Rome, Stem Cell Transplant Unit, Policlinico Universitario Tor Vergata, Rome, Italy; <sup>9</sup>Klinikum Grosshadern, Med. Klinik III, Munich, Germany; <sup>10</sup>Ospedale San Gerardo, Clinica Ematologica dell'Università Milano-Biocca, Monza, Italy; <sup>11</sup>Baskent University Hospital, Hematology Division, Bone Marrow Transplantation Unit, Adana, Turkey; <sup>12</sup>First State Pavlov Medical University of St. Petersburg, Raisa Gorbacheva Memorial Research Institute for Pediatric Oncology, Hematology, and Transplantation, St. Petersburg, Russia; <sup>13</sup>First Affiliated Hospital of Soochow University, Department of Hematology, Suzhou, China; <sup>14</sup>Florence Nightingale Sisli Hospital, Hematopoietic Stem Cell Transplantation Unit, Istanbul, Turkey; <sup>15</sup>University Hospital Center Zagreb, School of Medicine, University of Zagreb, Zagreb, Croatia; <sup>16</sup>Department of Bone Marrow Transplantation and Oncohematology, Maria Skłodowska-Curie Memorial Cancer Center and Institute of Oncology, Gliwice, Poland; <sup>17</sup>Department of Hematology-Oncology, Vanderbilt University Medical Center, Nashville, TN, USA and <sup>18</sup>Department of Hematology and EBMT Paris study office / CEREST-TC, Saint Antoine Hospital, INSERM UMR 938 and Université Pierre et Marie Curie, Paris, France

\*AN, ASK and ML contributed equally as co-first authors.

©2021 Ferrata Storti Foundation. This is an open-access paper. doi:10.3324/haematol.2020.247296

Received: January 12, 2020.

Accepted: April 28, 2020.

Pre-published: April 30, 2020.

Correspondence: ABRAHAM S. KANATE - askanate@hsc.wvu.edu



|                          |                  |                  |                  |                 |                  |                  |                  |                  |                  |
|--------------------------|------------------|------------------|------------------|-----------------|------------------|------------------|------------------|------------------|------------------|
| Male recipient           | 33.2%[27.6-39]   | 16.8%[12.5-21.5] | 33.2%[26.9-39.7] | 12.4%[8.3-17.3] | 36.1%[29.8-42.5] | 28.3%[22.7-34]   | 35.6%[29.2-42]   | 43.7%[37-50.3]   | 26.7%[20.7-32.7] |
| Female recipient         | 26.9%[20-34.3]   | 7.4%[3.9-12.3]   | 25.9%[18.4-33.9] | 8.1%[4.1-13.9]  | 35.2%[26.9-43.5] | 27.7%[20.3-35.5] | 37.2%[28.5-45.8] | 43.7%[34.7-52.7] | 34.1%[25.7-42.5] |
| <i>P</i> -value          | 0.10             | 0.006            | 0.19             | 0.37            | 0.91             | 0.72             | 0.66             | 0.73             | 0.18             |
|                          |                  |                  |                  |                 |                  |                  |                  |                  |                  |
| Male donor               | 28%[22.2-34]     | 13.5%[9.4-18.3]  | 23.9%[17.9-30.4] | 7.6%[4.3-12]    | 34.9%[28.2-41.7] | 30.5%[24.2-36.9] | 34.6%[27.7-41.5] | 38.4%[31.2-45.5] | 28.7%[22.1-35.2] |
| Female donor             | 34.6%[27.9-41.4] | 13.6%[9.2-18.9]  | 39%[31.1-46.8]   | 15.5%[10-22]    | 37%[29.4-44.6]   | 25.5%[19.3-32.2] | 37.4%[29.7-45.2] | 49.1%[41.2-57.1] | 29.7%[22.3-37]   |
| <i>P</i> -value          | 0.09             | 0.97             | 0.007            | 0.03            | 0.95             | 0.15             | 0.16             | 0.049            | 0.46             |
|                          |                  |                  |                  |                 |                  |                  |                  |                  |                  |
| No Female (D) → Male (R) | 29.5%[24.4-34.8] | 12.3%[8.9-16.4]  | 27.1%[21.6-32.8] | 8.7%[5.6-12.8]  | 35.1%[29.2-41.1] | 29.1%[23.8-34.7] | 35.7%[29.6-41.8] | 40.7%[34.3-47.1] | 29.7%[23.8-35.5] |
| Female (D) → male (R)    | 34.5%[26.1-43.1] | 16%[10-23.1]     | 38.5%[28.6-48.3] | 16.1%[9.4-24.5] | 37%[27.5-46.6]   | 25.5%[17.8-33.9] | 37.5%[27.8-47.1] | 50.6%[40.8-60.4] | 28.6%[19.6-37.7] |
| <i>P</i> -value          | 0.18             | 0.31             | 0.07             | 0.07            | 0.93             | 0.46             | 0.58             | 0.31             | 0.95             |
|                          |                  |                  |                  |                 |                  |                  |                  |                  |                  |
| Recipient CMV (-)        | 25.7%[17.2-35.2] | 8.9%[4.1-15.9]   | 42.2%[30.4-53.5] | 7.7%[3.1-15.1]  | 32%[21.5-42.9]   | 23.9%[14.9-34]   | 44.1%[32.3-55.9] | 54.4%[43-65.8]   | 38.8%[27.6-50]   |
| Recipient CMV (+)        | 32.4%[27.3-37.6] | 14.8%[11.1-18.9] | 28%[22.6-33.6]   | 11.7%[8.1-16.1] | 37.4%[31.6-43.2] | 28.6%[23.6-33.9] | 34%[28.2-39.7]   | 40.8%[34.8-46.9] | 26.7%[21.2-32.1] |
| <i>P</i> -value          | 0.2              | 0.16             | 0.03             | 0.39            | 0.45             | 0.59             | 0.22             | 0.15             | 0.15             |
|                          |                  |                  |                  |                 |                  |                  |                  |                  |                  |
| Donor CMV (-)            | 23.9%[16.4-32.4] | 10%[5.3-16.4]    | 31.2%[21.7-41.2] | 8%[3.4-15.1]    | 35.1%[25.4-44.8] | 21.7%[14-30.5]   | 43.3%[32.9-53.6] | 50.2%[39.7-60.8] | 37.7%[27.7-47.7] |
| Donor CMV (+)            | 34.1%[28.7-39.5] | 15%[11.2-19.3]   | 31.4%[25.6-37.4] | 12.2%[8.4-16.8] | 36.1%[30.1-42.1] | 29.9%[24.6-35.4] | 34%[28-40]       | 41.9%[35.6-48.1] | 26.6%[20.9-32.2] |
| <i>P</i> -value          | 0.03             | 0.21             | 0.95             | 0.41            | 0.93             | 0.13             | 0.21             | 0.14             | 0.14             |

Supplemental Table 1. Univariate analysis of post-transplant outcomes after haploidentical transplantation in ALL patients

Abbreviations: GVHD – graft-versus-host disease; NRM – non-relapse mortality; LFS – leukemia-free survival; OS – overall survival; GRFS – GVHD/relapse-free survival; HCT – hematopoietic cell transplantation; CR – complete remission; ALL – acute lymphoblastic leukemia; KPS – Karnofsky performance score; BM – bone marrow; PB – peripheral blood; MAC – myeloablative conditioning; RIC – reduced intensity conditioning; D – donor; R – recipient; CMV – cytomegalovirus

Supplemental Table 2. Subset analysis of post-transplant outcomes by graft source (Bone marrow vs. peripheral blood)

|                             |                 | 100-day<br>Acute GVHD II-IV | 2-year<br>Chronic GVHD | 2-year<br>Relapse | 2-year<br>NRM    | 2-year<br>LFS    | 2-year<br>OS     | 2-year<br>GRFS   |
|-----------------------------|-----------------|-----------------------------|------------------------|-------------------|------------------|------------------|------------------|------------------|
| <b>Bone<br/>Marrow</b>      | ATG (n=31)      | 35.5%[19.1-52.3]            | 26.7%[11-45.3]         | 55.4%[34.6-71.9]  | 20.4%[7.9-37]    | 24.2%[8-40.3]    | 34.8%[17.1-52.5] | 20.6%[5.2-36]    |
|                             | PTCy (n=175)    | 25.4%[19-32.3]              | 29.6%[22.1-37.6]       | 33.7%[26.1-41.5]  | 26.9%[20.1-34.1] | 39.4%[31.2-47.6] | 48.6%[40.3-57]   | 32.7%[24.9-40.5] |
|                             | <i>P</i> -value | 0.17                        | 0.52                   | <b>0.06</b>       | 0.41             | 0.41             | 0.30             | 0.75             |
| <b>Peripheral<br/>Blood</b> | ATG (n=67)      | 31.4%[20.3-43]              | 28.3%[15.9-42]         | 35.7%[23-48.6]    | 39.7%[26.5-52.6] | 24.6%[12.4-36.8] | 23.3%[11.4-35.3] | 20.8%[9.3-32.4]  |
|                             | PTCy (n=161)    | 36%[28.5-43.6]              | 34.1%[25.9-42.4]       | 34%[25.6-42.5]    | 26.5%[19.6-34]   | 39.5%[30.7-48.3] | 48.4%[39.4-57.3] | 30.8%[22.5-39.1] |
|                             | <i>P</i> -value | 0.82                        | 0.77                   | 0.52              | <b>0.06</b>      | 0.008            | 0.001            | 0.03             |

Abbreviations: GVHD – graft-versus-host disease; NRM – non-relapse mortality; LFS – leukemia-free survival; OS – overall survival; GRFS – GVHD-free/relapse-free survival; ATG – anti-thymocyte globulin; PTCy – post-transplant cyclophosphamide

Supplemental Table 3. Subset analysis of post-transplant outcomes by ATG dose in available subjects (N=81), stratified by < or ≥ to median dose of 20 mg/Kg.

| ATG dose (N=81) | 100-day Acute GVHD II-IV | 2-year Chronic GVHD | 2-year Relapse    | 2-year NRM        | 2-year LFS     | 2-year OS         | 2-year GRFS      |
|-----------------|--------------------------|---------------------|-------------------|-------------------|----------------|-------------------|------------------|
| <20 mg/Kg       | 53.4% [33.5-69.8]        | 26.3% [9.8-46.4]    | 51.2% [25.3-72.1] | 26% [10.9-44.1]   | 22.9% [2.7-43] | 25.9% [5.7-46.2]  | 19.9% [0-40.3]   |
| ≥20 mg/Kg       | 23.3% [11.9-36.8]        | 22.5% [10.8-36.7]   | 44.6% [29-59]     | 35.3% [21.1-49.8] | 20.2% [8-32.4] | 24.8% [11.7-37.9] | 18.1% [6.4-29.8] |
| <i>P</i> -value | <b>0.007</b>             | 0.68                | 0.95              | 0.67              | 0.54           | 0.78              | 0.40             |

Abbreviations: GVHD – graft-versus-host disease; NRM – non-relapse mortality; LFS – leukemia-free survival; OS – overall survival; GRFS – GVHD-free/relapse-free survival; ATG – anti-thymocyte globulin
